# Supplementary material
Source: MDPI journal article supplement (https://www.mdpi.com/2304-6740/11/11/439)
Supplement: s1 [file s1]

Article

# Photocatalytic degradation of contaminants of emerging concern by N-doped TiO<sub>2</sub> using simulated sunlight in real water matrices

E. Gaggero, A. Giovagnoni, A. Zollo, P. Calza\*, M.C. Paganini

Department of Chemistry, University of Turin, Via Pietro Giuria 5/7, 10126 Turin, Italy

\*paola.calza@unito.it;

## Supplementary materials

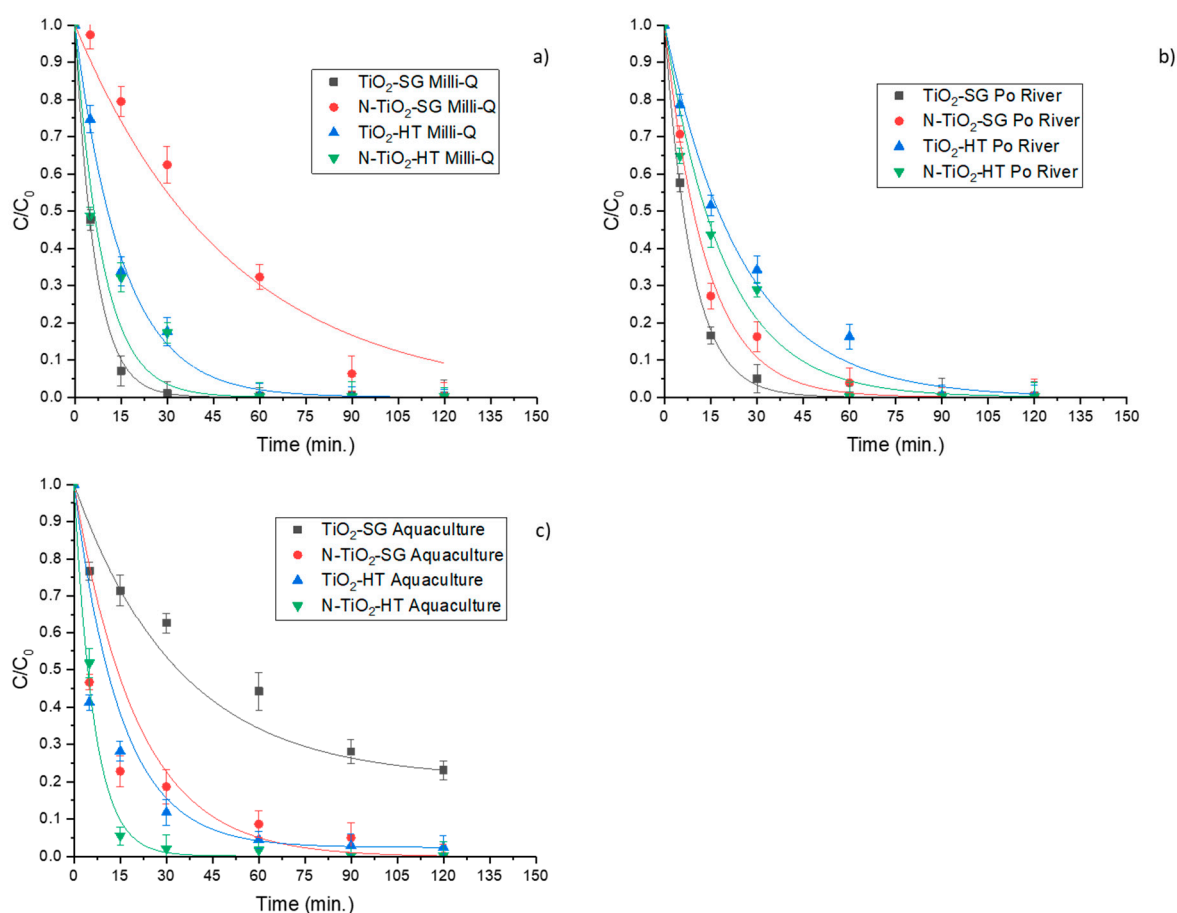

Figure S1: Degradation curves of benzotriazole using the synthesized photocatalyst in different matrices (a) Milli-Q, (b) Po River, (c) aquaculture water irradiating with lamp equipped with  $\lambda > 340$  nm cut-off.

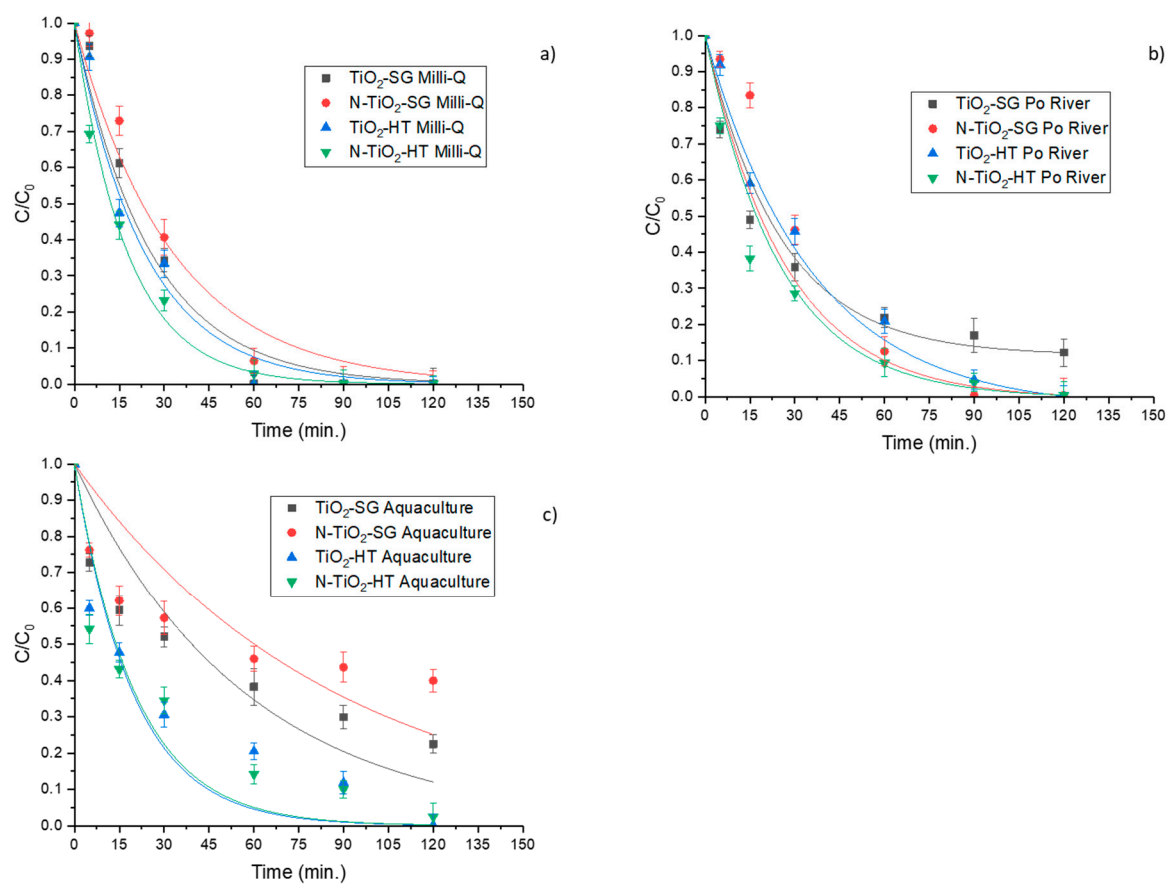

Figure S2. Degradation curves of bisphenol A using the synthesized photocatalyst in different matrices (a) Milli-Q, (b) Po River, (c) aquaculture water irradiating with lamp equipped with  $\lambda > 340$  nm cut-off.

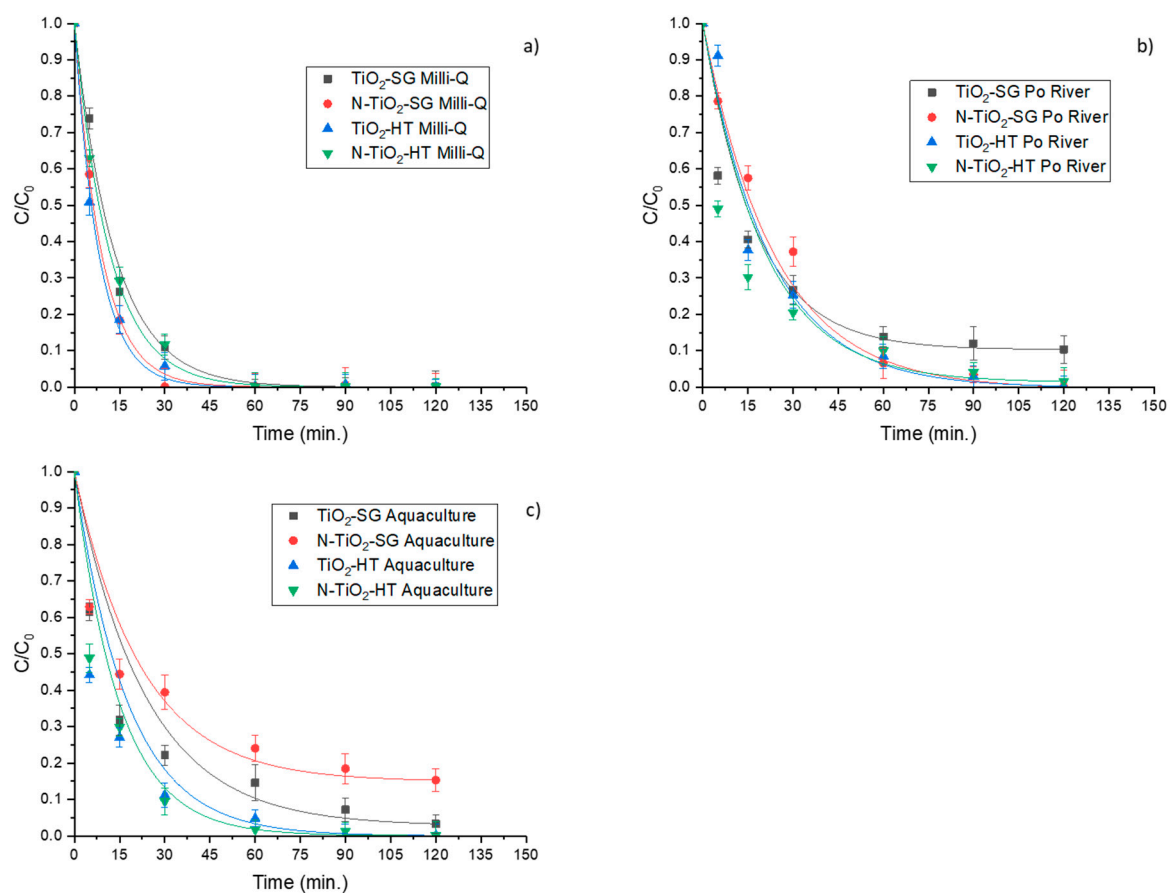

Figure S3. Degradation curves of sulfamethoxazole using the synthesized photocatalyst in different matrices (a) Milli-Q, (b) Po River, (c) aquaculture water irradiating with lamp equipped with  $\lambda > 340$  nm cut-off.

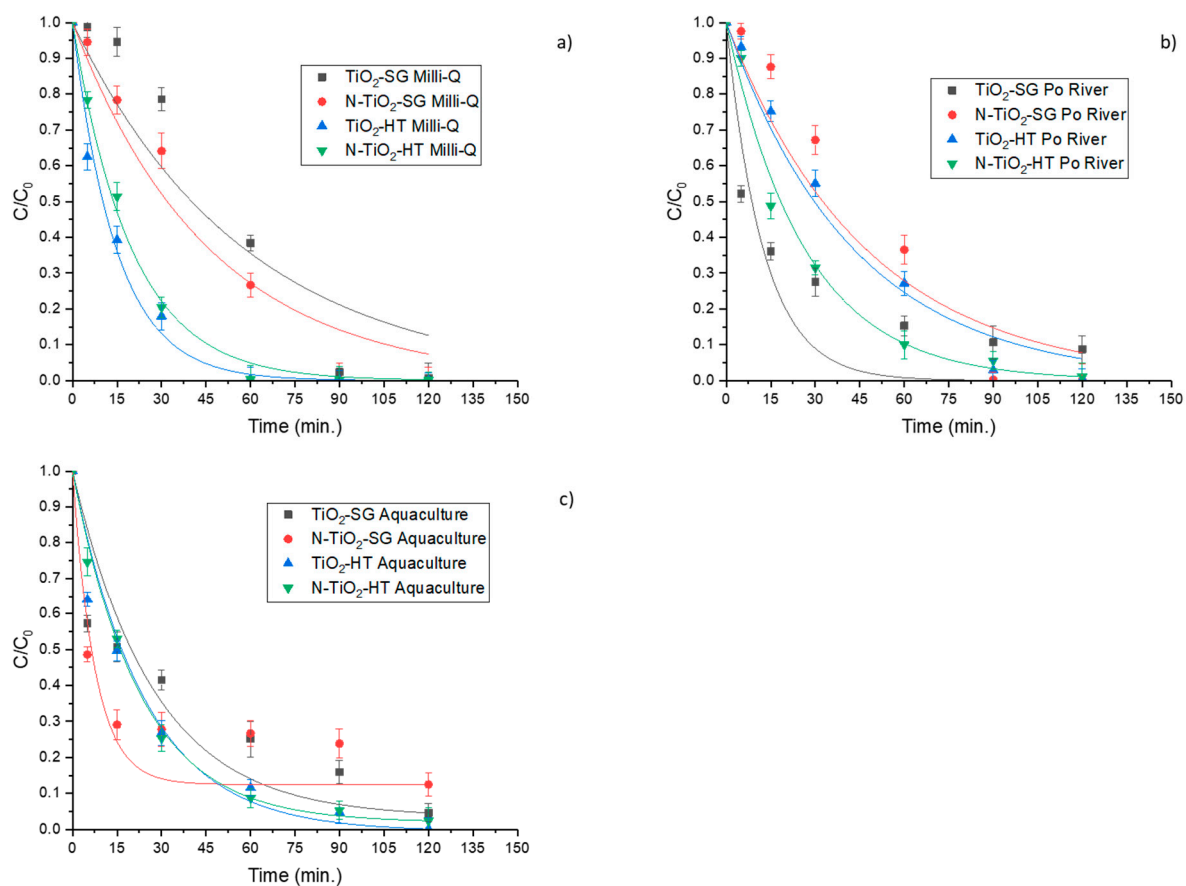

Figure S4. Degradation curves of diclofenac using the synthesized photocatalyst in different matrices (a) Milli-Q, (b) Po River, (c) aquaculture water irradiating with lamp equipped with  $\lambda > 340$  nm cut-off.

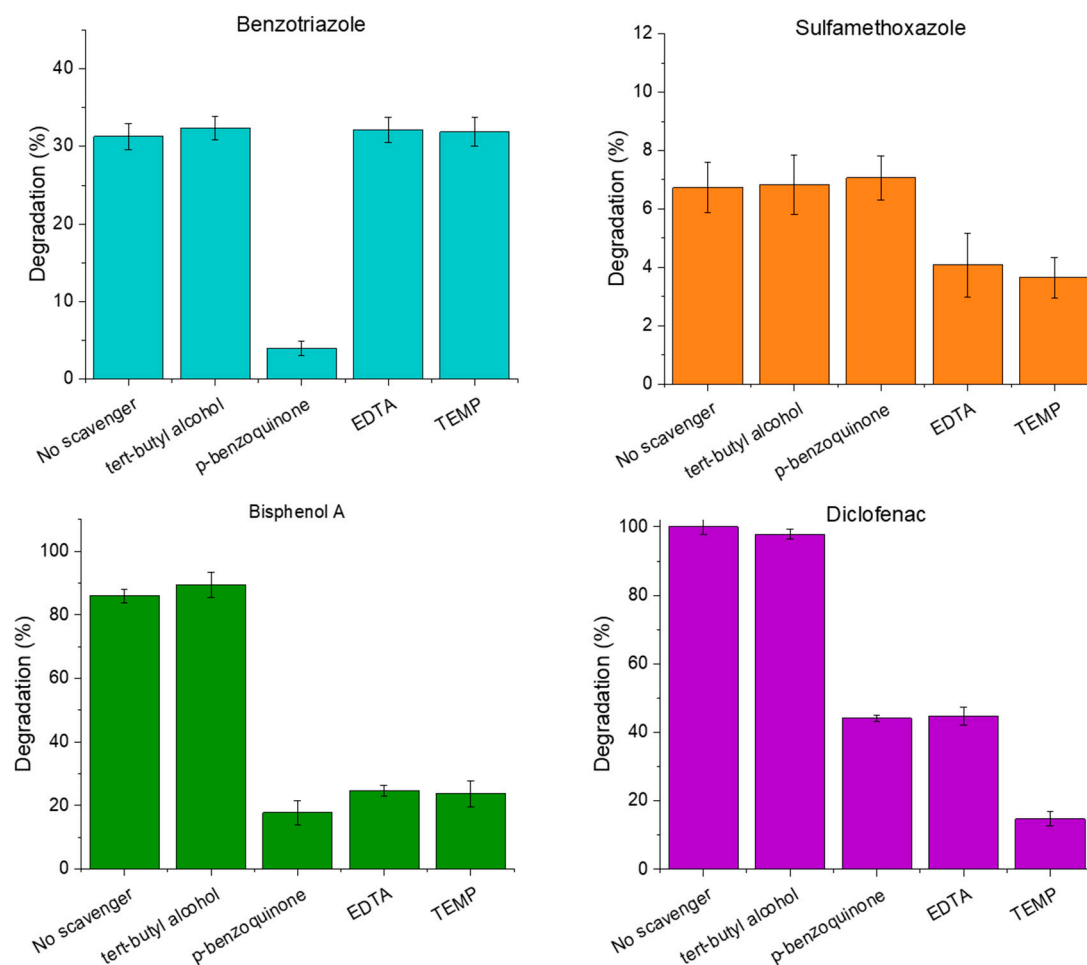

Figure S5. The degradation percentage of CECs obtained using N-TiO<sub>2</sub> HT photocatalyst after two hours of irradiation with  $\lambda > 400$  nm in the presence of t-butyl alcohol, p-benzoquinone, EDTA and TEMP as scavengers of hydroxyl radicals, superoxide radicals, holes and singlet oxygen respectively.

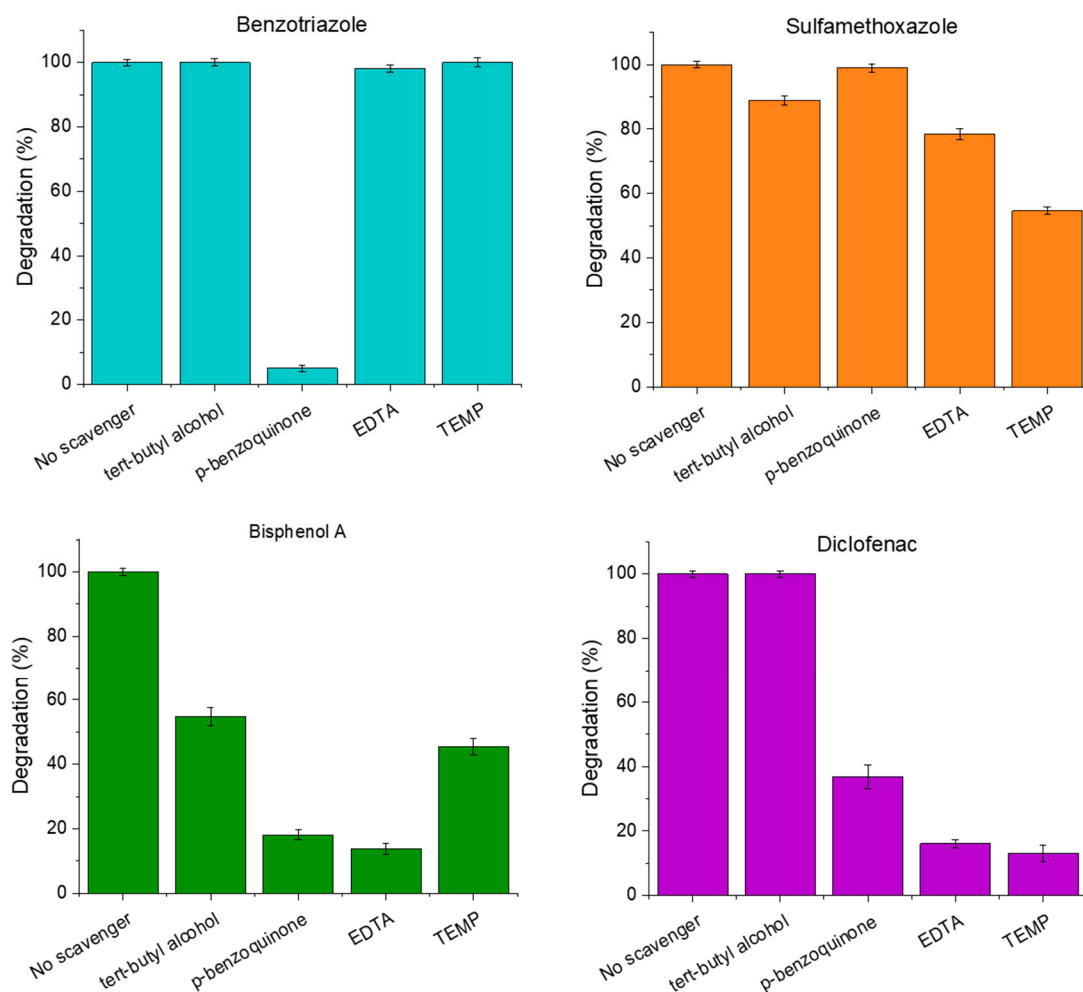

Figure S6. The degradation percentage of CECs obtained using N-TiO<sub>2</sub> SG photocatalyst after two hours of irradiation with  $\lambda > 400$  nm in the presence of t-butyl alcohol, p-benzoquinone, EDTA and TEMP as scavengers of hydroxyl radicals, superoxide radicals, holes and singlet oxygen respectively.
